# Supplementary material for: Urothermal synthesis of photoluminescent lanthanide–organic frameworks with unusual topologies
Source: Royal Society of Chemistry journal article supplement (doi:10.1039/c2ce26242h), 2012-10-23
Supplement: c2ce26242h.pdf [file c2ce26242h.pdf]

## Electronic Supplementary Information:

### Urothermal synthesis of photoluminescent lanthanide-organic frameworks with unusual topologies

**Zhi-Qiang Jiang,<sup>a,b,c</sup> Gui-Yuan Jiang,<sup>a</sup> Duan-Chuan Hou,<sup>a</sup> Fei Wang,<sup>b</sup> Zhen  
Zhao<sup>a, \*</sup> and Jian Zhang<sup>a,b,\*</sup>**

<sup>a</sup> *State Key Laboratory of Heavy Oil Processing, China University of Petroleum,  
Beijing 102249, P. R. China. E-mail: zhenzhao@cup.edu.cn*

<sup>b</sup> *State Key Laboratory of Structural Chemistry, Fujian Institute of Research on the  
Structure of Matter, Chinese Academy of Sciences, Fuzhou, Fujian 350002, P. R.  
China. E-mail: zhj@fjirsm.ac.cn.*

<sup>c</sup> *Biology&Chemistry Engineering College of PanZhiHua University, Panzhihua,  
Sichuan, 617000, P. R. China.*

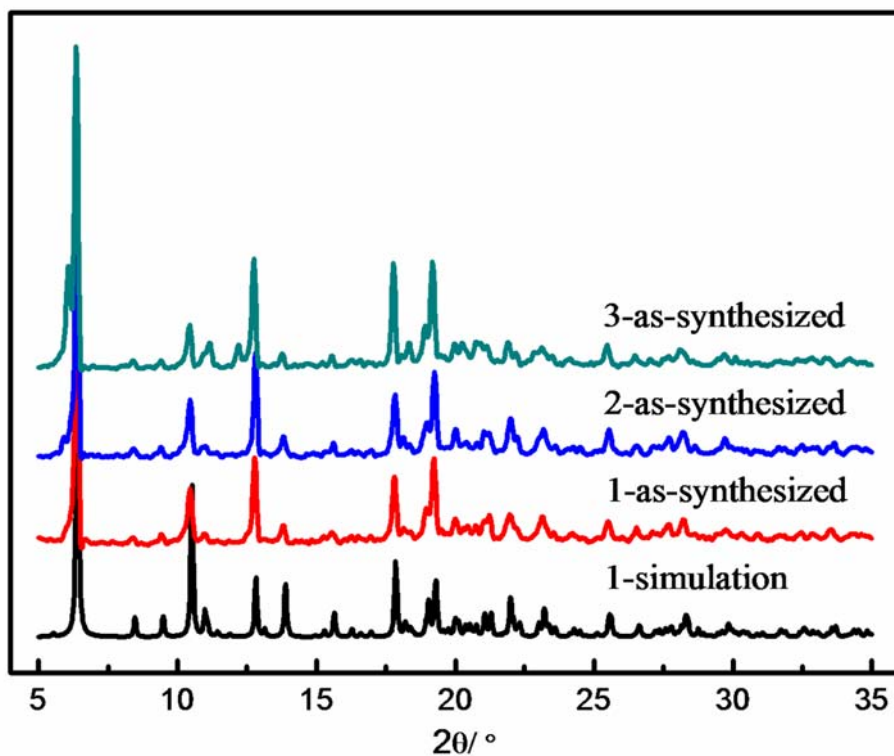

**Figure S1.** Characterization of bulk phase of **1**, **2** and **3** by PXRD

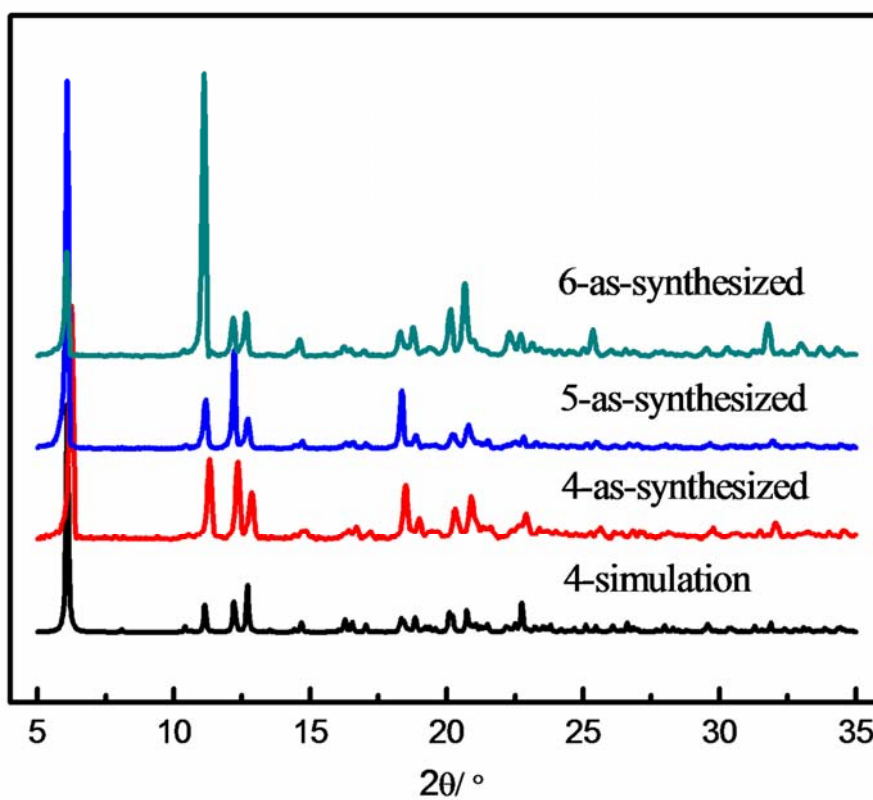

**Figure S2.** Characterization of bulk phase of **4**, **5** and **6** by PXRD

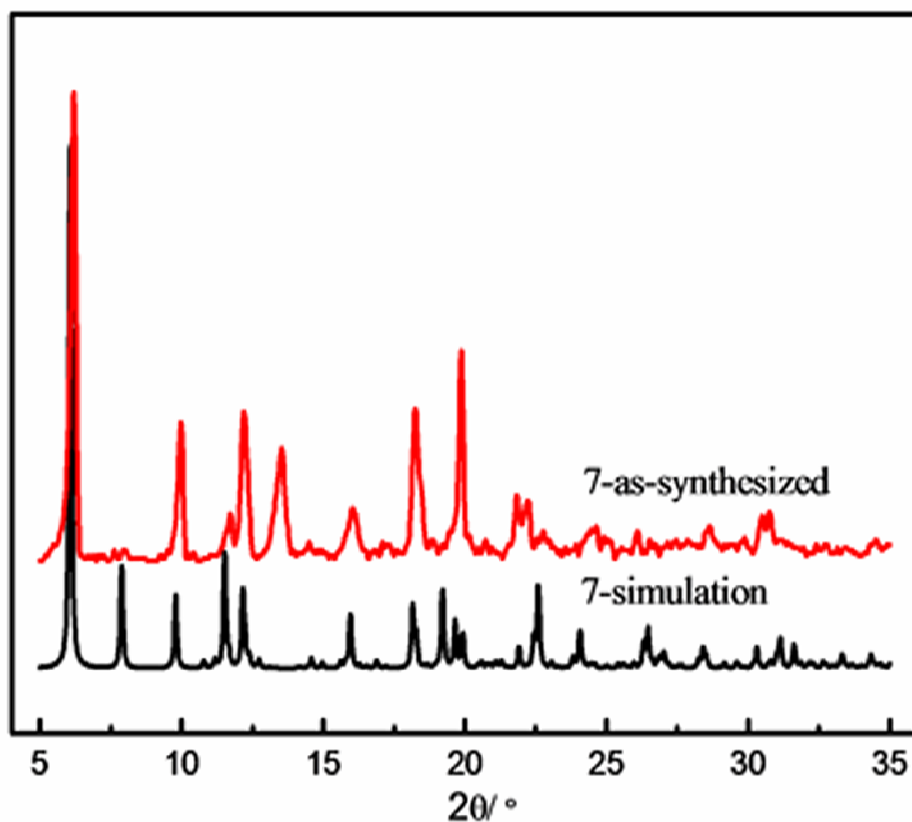

**Figure S3.** Characterization of bulk phase of **7** by PXRD

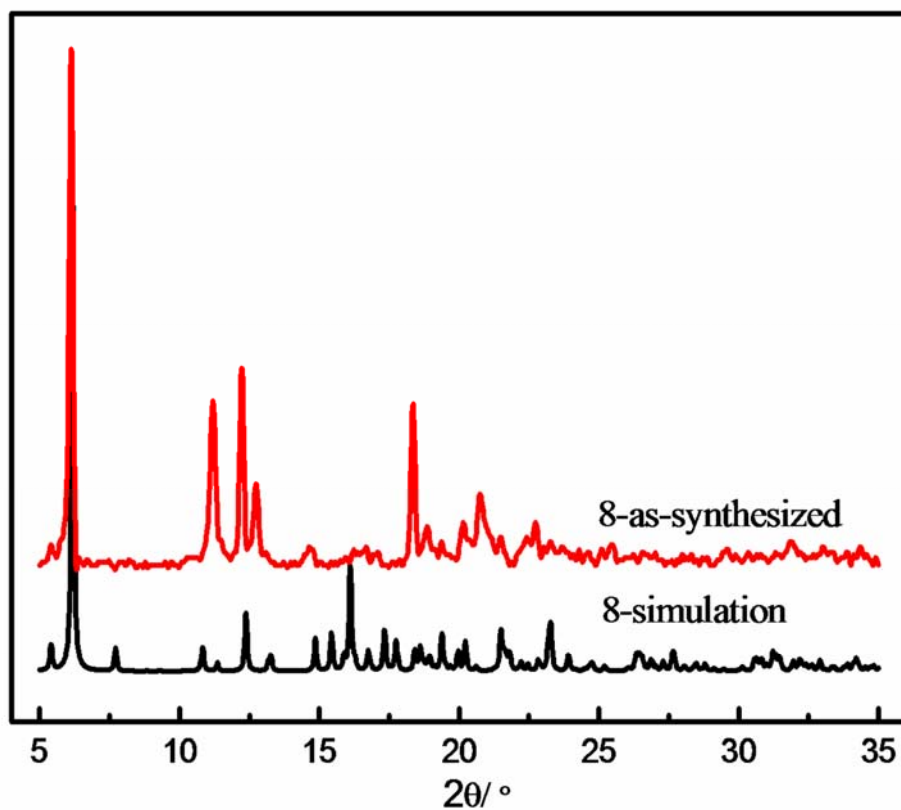

**Figure S4.** Characterization of bulk phase of **8** by PXRD

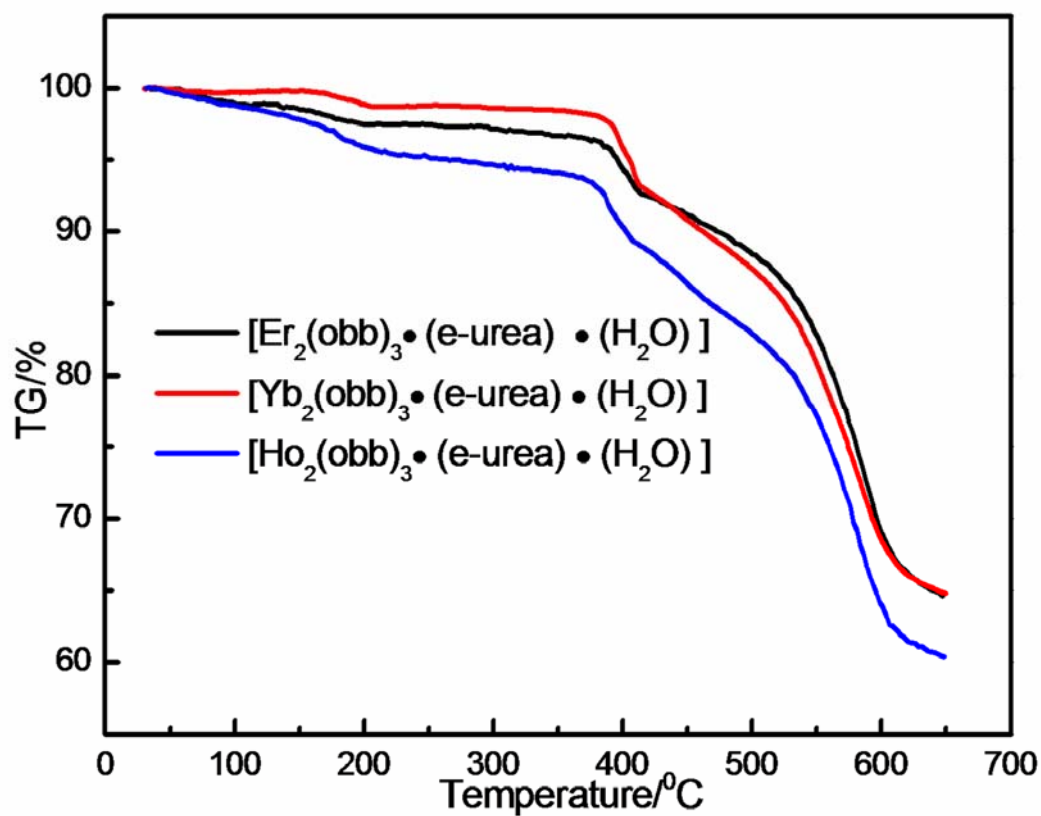

Figure S5. The TGA plots of 1, 2 and 3

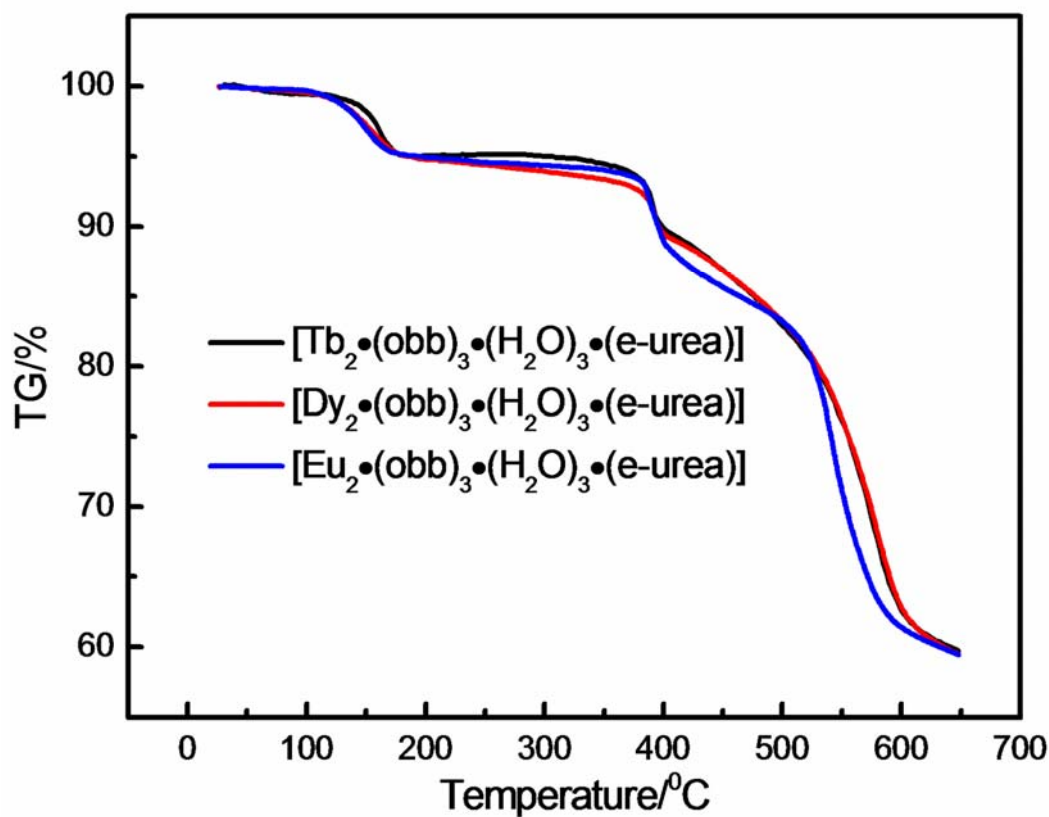

Figure S6. The TGA plots of 4, 5 and 6

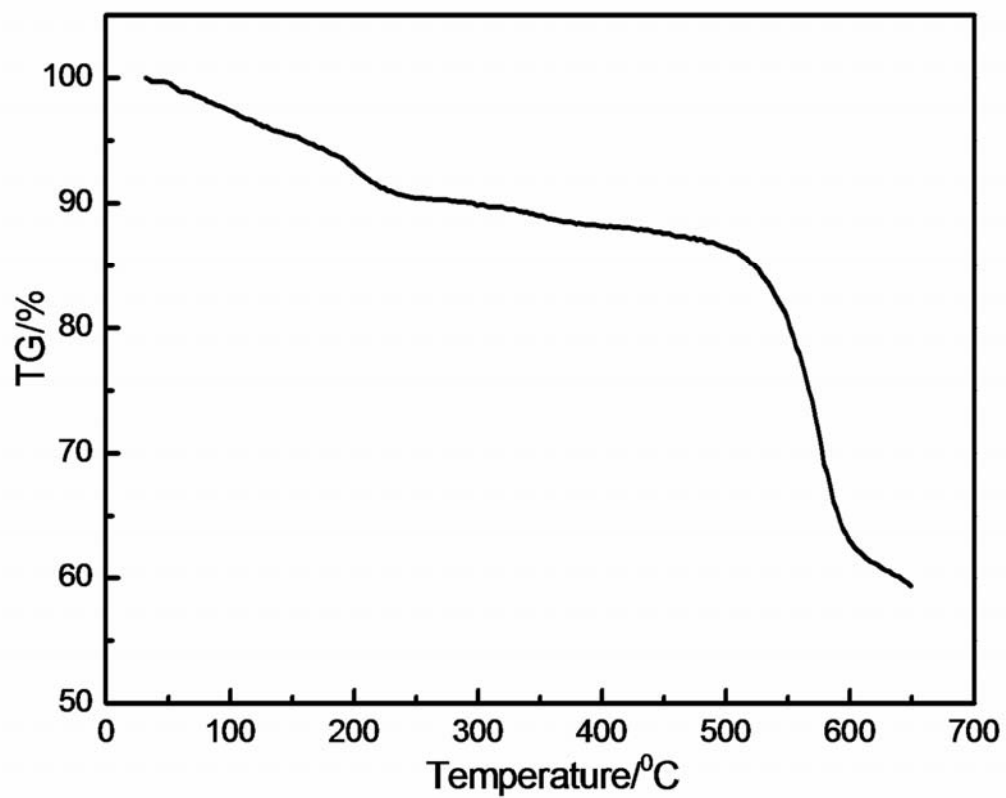

**Figure S7.** The TGA plots of **7**

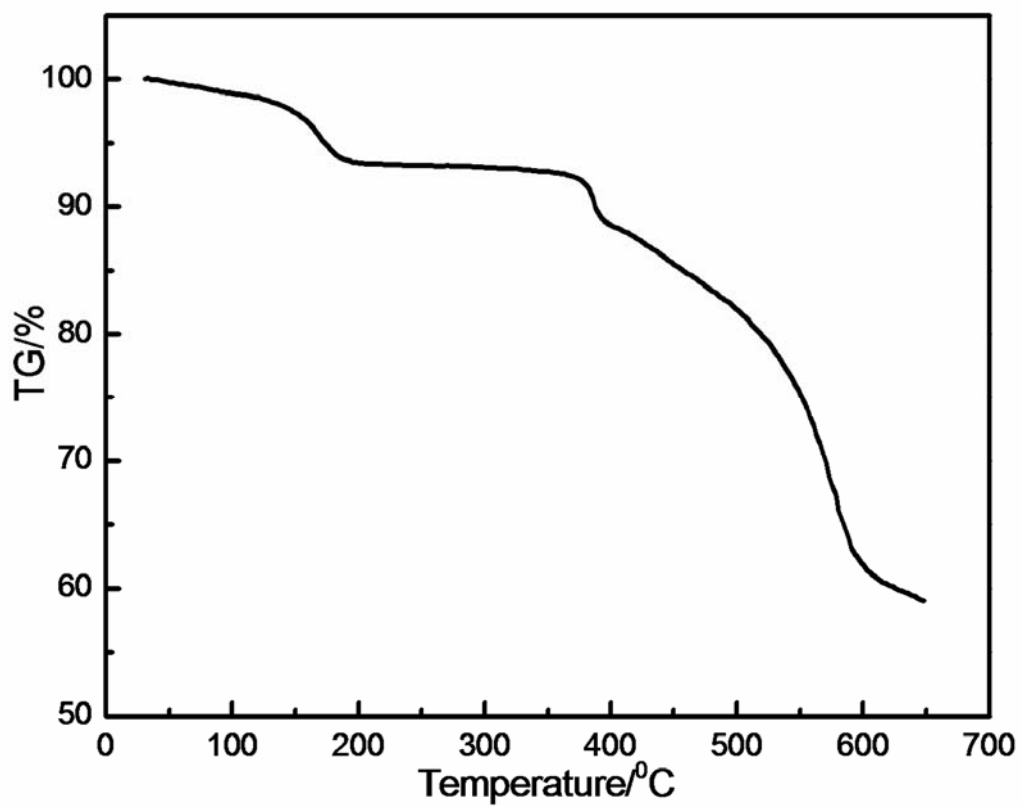

**Figure S8.** The TGA plots of **8**
